# Supplementary material
Source: publisher figshare collection journal article supplement (https://gsapubs.figshare.com/ndownloader/files/23316176)
Supplement: Supplementary file 1 [file 23316176]

## Sheet: IODP_Samples_Amazon_Fan
EXPEDITION	SITE	HOLE	CORE	CORE_TYPE	SECTION	CC	TOP_DEPTH	BOTTOM_DEPTH	VOLUME	MBSF_TOP	MCD_TOP	HALF	ANALYST	LOCATION	REQUEST	REQUEST_PART	TYPE	SAMPLE_DATE	SAMPLE	New_Sample_ID (of Mason et al.)	IGSN	REMARKS
155	946	A	1	H	2	no	34	37	39	1.84	1.84	W	CM	BCR	053946IODP	A	---	8/10/2017 12:00:00 AM	5046792	946-1	IBCR0155RXO4604	3/3
155	946	A	1	H	2	no	79	91	234	2.29	2.29	W	CM	BCR	053946IODP	A	---	8/10/2017 12:00:00 AM	5046790	946-1	IBCR0155RXM4604	whole interval sampled across core 1/n
155	946	A	1	H	2	no	99	102	81	2.49	2.49	W	CM	BCR	053946IODP	A	---	8/10/2017 12:00:00 AM	5046791	946-1	IBCR0155RXN4604	2/n whole interval across core
155	946	A	6	H	2	no	75	95	243	47.25	47.25	W	CM	BCR	053946IODP	A	---	8/10/2017 12:00:00 AM	5046797	946-2	IBCR0155RXT4604
155	946	A	7	H	2	no	35	55	262	56.35	56.35	W	CM	BCR	053946IODP	A	---	8/10/2017 12:00:00 AM	5046799	946-3	IBCR0155RXV4604
155	946	A	9	H	6	no	90	111	276	81.9	81.9	W	CM	BCR	053946IODP	A	---	8/10/2017 12:00:00 AM	5046802	946-4	IBCR0155RXY4604
155	946	A	12	H	1	no	109	127	250	103.09	103.09	W	CM	BCR	053946IODP	A	---	8/10/2017 12:00:00 AM	5046804	946-5	IBCR0155RX05604
155	946	A	13	H	2	no	19	40	279	113.19	113.19	W	CM	BCR	053946IODP	A	---	8/10/2017 12:00:00 AM	5046809	946-6	IBCR0155RX55604
155	946	A	14	H	2	no	38	58	282	122.41	122.41	W	CM	BCR	053946IODP	A	---	8/10/2017 12:00:00 AM	5046812	946-7	IBCR0155RX85604
155	946	A	21	X	1	no	90	96	168	189.1	189.1	W	CM	BCR	053946IODP	A	---	8/10/2017 12:00:00 AM	5046820	946-8	IBCR0155RXG5604	low volume sample
155	946	A	23	X	2	no	84	105	260	209.84	209.84	W	CM	BCR	053946IODP	A	---	8/10/2017 12:00:00 AM	5046824	946-9	IBCR0155RXK5604
155	945	A	1	H	2	no	102	121	262	2.52	2.52	W	CM	BCR	053946IODP	A	---	8/10/2017 12:00:00 AM	5046784	945-1	IBCR0155RXG4604
155	936	A	35	X	1	no	10	14	86	318.3	318.3	W	CM	BCR	053946IODP	A	---	8/10/2017 12:00:00 AM	5046773	936-2	IBCR0155RX54604	1/n
155	936	A	35	X	1	no	26	32	134	318.46	318.46	W	CM	BCR	053946IODP	A	---	8/10/2017 12:00:00 AM	5046775	936-2	IBCR0155RX74604	2/n
155	936	A	35	X	1	no	67	76	93	318.87	318.87	W	CM	BCR	053946IODP	A	---	8/10/2017 12:00:00 AM	5046776	936-2	IBCR0155RX84604	3/3
